# Supplementary material for: Novel genotype–phenotype associations demonstrated by high-throughput sequencing in patients with hypertrophic cardiomyopathy
Source: HighWire-hosted journal article supplement (doi:10.1136/heartjnl-2014-306387), 2014-10-28
Supplement: heartjnl-2014-306387supp_table2.pdf [file heartjnl-2014-306387supp_table2.pdf]

Supplementary table 2. Genotype-phenotype associations for individual sarcomere protein and related genes, with P-values <0.05. P-values reflect the comparison for proportions or means, between patients with and without a rare variant in a given gene.

| Phenotype                            | Gene          | Frequency or mean±standard deviation - Rare variant present | Frequency or mean±standard deviation - Rare variant absent | P-value                 |
|--------------------------------------|---------------|-------------------------------------------------------------|------------------------------------------------------------|-------------------------|
| Age at initial evaluation (years)    | <i>MYBPC3</i> | 45.5±14.4                                                   | 51.0±15.5                                                  | 8.97x10 <sup>-6</sup>   |
|                                      | <i>MYH7</i>   | 43.9±15.4                                                   | 50.5±15.2                                                  | 1.91x10 <sup>-5</sup>   |
|                                      | <i>TNNT2</i>  | 43.5±14.7                                                   | 49.8±15.4                                                  | 0.031                   |
|                                      | <i>CSRP3</i>  | 56.7±8.1                                                    | 49.5±15.5                                                  | 0.006                   |
|                                      | <i>VCL</i>    | 43.2±17.6                                                   | 49.8±15.3                                                  | 0.0361                  |
| Family history of HCM                | <i>MYBPC3</i> | 40.4% (86/213)                                              | 21.9% (140/640)                                            | 2.7x10 <sup>-7</sup>    |
|                                      | <i>MYH7</i>   | 47.4% (54/114)                                              | 23.4% (173/740)                                            | 3.06x10 <sup>-7</sup>   |
| LA diameter (mm)                     | <i>RBM20</i>  | 40.9±6.8                                                    | 44.2±7.5                                                   | 0.00239                 |
| MLVWT (mm)                           | <i>MYBPC3</i> | 19.4±4.7                                                    | 18.2±4.2                                                   | 0.0005                  |
| LV end-diastolic diameter (mm)       | <i>MYBPC3</i> | 44.8±5.5                                                    | 46.3±6.0                                                   | 0.00089                 |
|                                      | <i>RBM20</i>  | 43.6±5.2                                                    | 46.1±6.0                                                   | 0.00431                 |
| LV end-systolic diameter (mm)        | <i>MYBPC3</i> | 27.4±6.0                                                    | 28.8±5.4                                                   | 0.00512                 |
| Fractional shortening (%)            | <i>MYBPC3</i> | 39.7±8.9                                                    | 38.2±8.8                                                   | 0.026                   |
| LV systolic dysfunction              | <i>TNNI3</i>  | 15.8% (3/19)                                                | 3.2% (26/810)                                              | 0.020                   |
| ASH pattern                          | <i>MYBPC3</i> | 88.0% (184/209)                                             | 71.6% (459/641)                                            | 3.75x10 <sup>-6</sup>   |
|                                      | <i>MYH7</i>   | 89.2% (99/111)                                              | 73.6% (544/739)                                            | 0.00104                 |
|                                      | <i>MYH6</i>   | 81.2% (56/69)                                               | 75.2% (587/781)                                            | 0.025                   |
| Moderate-severe mitral regurgitation | <i>MYL2</i>   | 55.6% (5/9)                                                 | 19.4% (158/814)                                            | 0.041                   |
| Right ventricular hypertrophy        | <i>TNNI3</i>  | 50% (10/20)                                                 | 21.6% (174/806)                                            | 0.004                   |
| LVOTO (>30 mmHg)                     | <i>TNNI3</i>  | 10% (2/20)                                                  | 41.2% (326/792)                                            | 0.00465                 |
| LVOT gradient (mmHg)                 | <i>TNNI3</i>  | 13.1±26.6                                                   | 34.8±41.3                                                  | 0.002                   |
| Family history of SCD                | <i>MYBPC3</i> | 28.7% (62/216)                                              | 18.3% (120/656)                                            | 0.001                   |
|                                      | <i>MYH7</i>   | 31.6% (37/117)                                              | 19.2% (145/775)                                            | 0.003                   |
|                                      | <i>TPM1</i>   | 62.5% (5/8)                                                 | 20.5% (177/864)                                            | 0.012                   |
| BP response to exercise (mmHg)       | <i>MYH7</i>   | 36.6±19.9                                                   | 50.2±24.4                                                  | 5.49 x 10 <sup>-6</sup> |
| BP response to exercise ≤ 20 mmHg    | <i>MYH7</i>   | 22.5% (20/89)                                               | 12.6% (72/573)                                             | 0.020                   |
|                                      | <i>TNNT2</i>  | 40.9% (9/22)                                                | 13.0% (83/640)                                             | 0.002                   |
| Syncope                              | <i>MYH7</i>   | 22.8% (26/114)                                              | 15.4% (114/742)                                            | 0.045                   |

|                                                                                                     |                                      |                |                 |                      |
|-----------------------------------------------------------------------------------------------------|--------------------------------------|----------------|-----------------|----------------------|
| <b>Implanted cardioverter-defibrillator</b>                                                         | <i>MYH7</i>                          | 28.2% (33/117) | 19.2% (145/756) | 0.027                |
| <b>Myectomy and/or alcohol septal ablation and/or pacemaker implantation for gradient reduction</b> | <i>MYBPC3</i><br>(splicing variants) | 43.1% (22/51)  | 20.0% (160/799) | $3.0 \times 10^{-4}$ |

HCM: hypertrophic cardiomyopathy; NYHA: New York Heart Association; LA: left atria; MLVWT: maximum left ventricular wall thickness; LV: left ventricular; ASH: asymmetric septal hypertrophy; LVOT: left ventricular outflow tract; LVOTO: left ventricular outflow tract obstruction; SCD: sudden cardiac death; BP: blood pressure;
