# Supplementary material for: Novel genotype–phenotype associations demonstrated by high-throughput sequencing in patients with hypertrophic cardiomyopathy
Source: Heart. 2014 Oct 28;101(4):294–301. doi: 10.1136/heartjnl-2014-306387 (PMC4345808; doi:10.1136/heartjnl-2014-306387)
Supplement: Web supplement [file heartjnl-2014-306387-s4.pdf]

Supplementary table 3. Genotype-phenotype associations for individual non-sarcomere protein genes, when only analysing the sub-cohort of sarcomere-positive individuals. P-values reflect the comparison for proportions or means, between the group of patients with versus the group of patients without a rare variant in a given non-sarcomere protein gene.

| Phenotype                          | Gene         | Frequency<br>mean±standard<br>deviation -<br><br>Variant present | or<br>Frequency<br>mean±standard<br>deviation -<br><br>Variant absent | P-value |
|------------------------------------|--------------|------------------------------------------------------------------|-----------------------------------------------------------------------|---------|
| LA diameter at last follow-up (mm) | <i>SCN5A</i> | 47.4±4.8                                                         | 44.1±7.8                                                              | 0.109   |
| LVOTO<br>(>30 mmHg)                | <i>SCN5A</i> | 50.0% (9/18)                                                     | 36.0% (122/339)                                                       | 0.315   |
|                                    | Ion-channel  | 43.6% (34/78)                                                    | 34.8% (97/279)                                                        | 0.184   |
| MLVWT (mm)                         | <i>ANK2</i>  | 19.9±6.2                                                         | 18.9±4.5                                                              | 0.377   |
| MLVWT ≥30mm                        | <i>ANK2</i>  | 16% (4/25)                                                       | 2.8% (7/251)                                                          | 0.007   |
| E/e' ratio                         | <i>CASQ2</i> | 17.5±7.7                                                         | 10.6±5.2                                                              | 0.004   |
| NSVT                               | <i>PLN</i>   | 100% (1/1)                                                       | 24.7% (61/247)                                                        | 0.083   |

LA: left atria; LVOTO: left ventricular outflow tract obstruction; MLVWT: maximal left ventricular wall thickness; E/e' ratio: ratio between the maximal velocity of the E wave from the pulsed wave Doppler of the transmitral flow and the maximal velocity of the e' wave of tissue Doppler at the mitral annulus; NSVT: non-sustained ventricular tachycardia.
